# Supplementary material
Source: PubMed Central journal article supplement (PMC4020579)
Supplement: bi500252w_si_001.pdf [file bi500252w_si_001.pdf]

| Data Collection                                                       |                        |
|-----------------------------------------------------------------------|------------------------|
| PDB entry                                                             | 4OU0                   |
| Wavelength (Å)                                                        | 0.97857                |
| Space group                                                           | P 65                   |
| Cell dimensions                                                       |                        |
| a, b, c (Å)                                                           | 69.556, 69.556, 23.567 |
| $\alpha$ , $\beta$ , $\gamma$ (°)                                     | 90, 90, 120            |
| Resolution range (Å)                                                  | 50-1.4                 |
| R-merge                                                               | 0.077 (0.357)          |
| Mean I/sigma(I)                                                       | 14.46 (4.51)           |
| Completeness (%)                                                      | 98.41 (89.03)          |
| Redundancy                                                            | 7.6 (6.1)              |
| Refinement                                                            |                        |
| Resolution (Å)                                                        | 30.12-1.4 (1.45-1.4)   |
| Number of reflections                                                 | 97592                  |
| Unique reflections                                                    | 12921 (1161)           |
| R-work                                                                | 0.1969 (0.2400)        |
| R-free                                                                | 0.2380 (0.3095)        |
| Number of non-hydrogen atoms                                          | 581                    |
| Protein                                                               | 528                    |
| Water                                                                 | 53                     |
| Protein residues                                                      | 66                     |
| B-factor (Å <sup>2</sup> )                                            |                        |
| Average B-factor                                                      | 35.4                   |
| Protein                                                               | 34.8                   |
| Water                                                                 | 40.76                  |
| Bonds (RMS deviation)                                                 |                        |
| Bond Lengths (Å)                                                      | 0.003                  |
| Bond Angles (°)                                                       | 0.8                    |
| Ramachandran plot (%)                                                 |                        |
| Favored (%)                                                           | 97                     |
| Allowed (%)                                                           | 3                      |
| Outliers (%)                                                          | 0                      |
| *Values in parentheses refer to those in the highest-resolution shell |                        |

*This material is available free of charge via the Internet at <http://pubs.acs.org>.*
